# Supplementary material for: High coverage adsorption and co-adsorption of CO and H2 on Ru(0001) from DFT and thermodynamics
Source: Royal Society of Chemistry journal article supplement (doi:10.1039/c5cp02486b), 2015-01-01
Supplement: c5cp02486b1.pdf [file c5cp02486b1.pdf]

## Supporting Information

### High Coverage Adsorption and Co-Adsorption of CO and H<sub>2</sub> on Ru(0001) from DFT and Thermodynamics

Peng Zhao,<sup>a,b,c</sup> Yurong He,<sup>a,b,c</sup> Dong-Bo Cao,<sup>a,b</sup> Xiaodong Wen,<sup>a,b</sup> Hongwei Xiang<sup>a,b</sup>

Yong-Wang Li,<sup>a,b</sup> Jianguo Wang,<sup>a</sup> Haijun Jiao<sup>a,d\*</sup>

*a) State Key Laboratory of Coal Conversion, Institute of Coal Chemistry, Chinese Academy of Sciences, Taiyuan, 030001, China;*

*b) National Energy Center for Coal to Liquids, Synfuels China Co., Ltd, Huairou District, Beijing, 101400, China; c) University of*

*Chinese Academy of Sciences, No.19A Yuquan Road, Beijing, 100049, PR China; d) Leibniz-Institut für Katalyse e.V. an der*

*Universität Rostock, Albert-Einstein Strasse 29a, 18059 Rostock, Germany. E-mail: [haijun.jiao@catalysis.de](mailto:haijun.jiao@catalysis.de)*

#### Table of content

|                                                                                                                                                        |         |
|--------------------------------------------------------------------------------------------------------------------------------------------------------|---------|
| <b>Figure S1:</b> Stepwise CO adsorption structures and energies ( $\Delta E_{\text{ads}}$ ) on Ru(0001) using the PBE functional                      | Page S2 |
| <b>Figure S2:</b> 10CO and 14CO adsorption structures and energies ( $\Delta E_{\text{ads}}$ ) on Ru(0001) using the PBE and PBE+D3                    | Page S3 |
| <b>Figure S3:</b> Stepwise H <sub>2</sub> adsorption structures and energies ( $\Delta E_{\text{ads}}$ ) on nCO pre-covered Ru(0001)                   | Page S4 |
| <b>Figure S4:</b> Dependence of surface Gibbs free energy ( $\Delta G$ ) and H <sub>2</sub> on temperature at $p_{\text{H}_2}/p^0 = 1 \times 10^{-13}$ | Page S5 |
| <b>Table S1.</b> Stepwise CO adsorption energies ( $E_{\text{ads}}$ , eV) including D3 corrections at different coverage                               | Page S6 |

**Figure S1.** Stepwise CO adsorption structures and energies ( $\Delta E_{\text{ads}}$ ) on Ru(0001) using the PBE functional (surface Ru/blue; C/black; O/red).

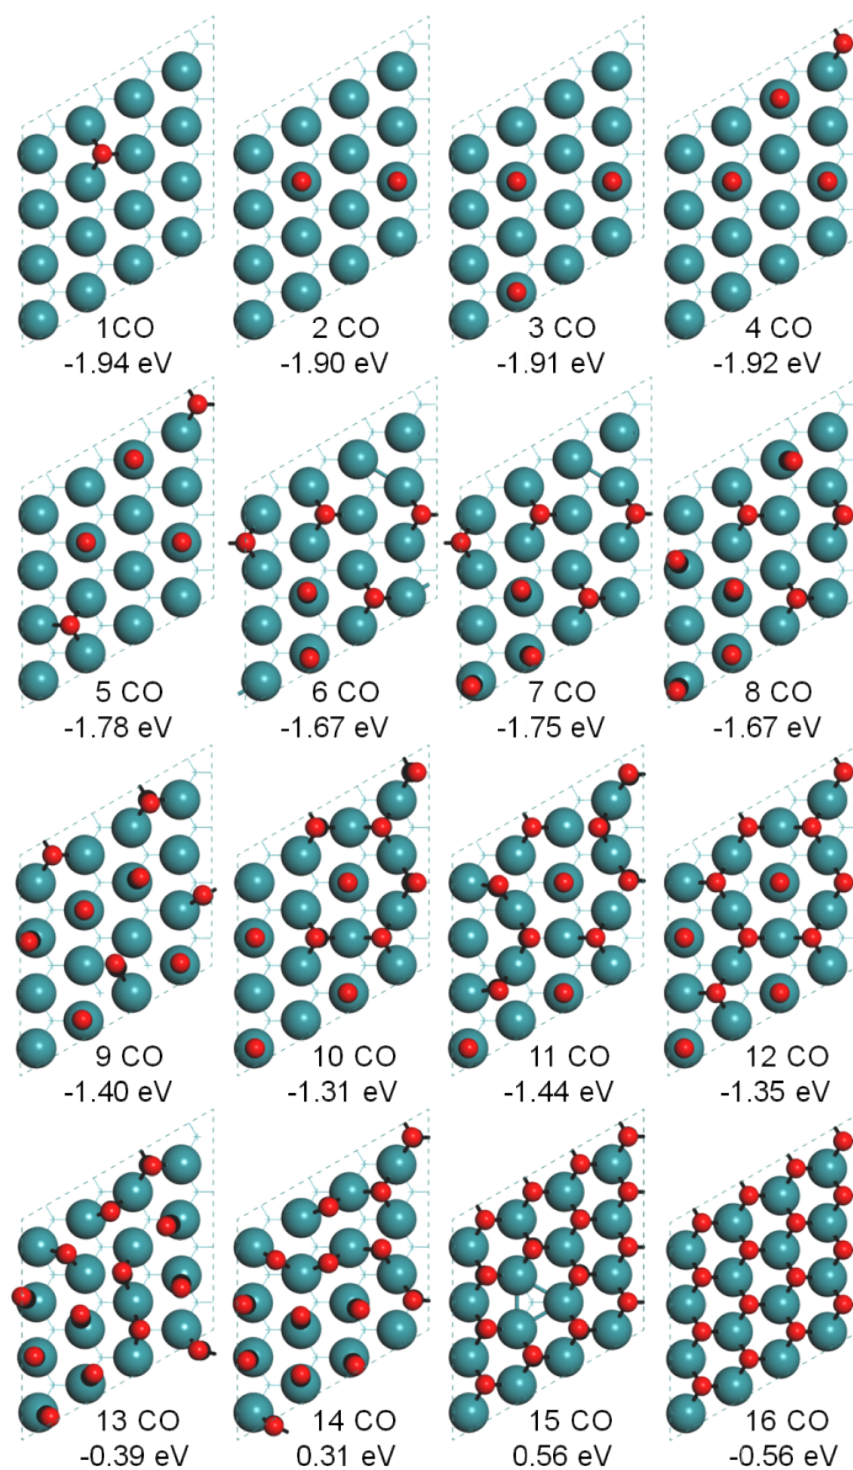

Figure S2: 10CO and 14CO adsorption structures and energies ( $\Delta E_{\text{ads}}$ ) on Ru(0001) using the PBE and PBE+D3

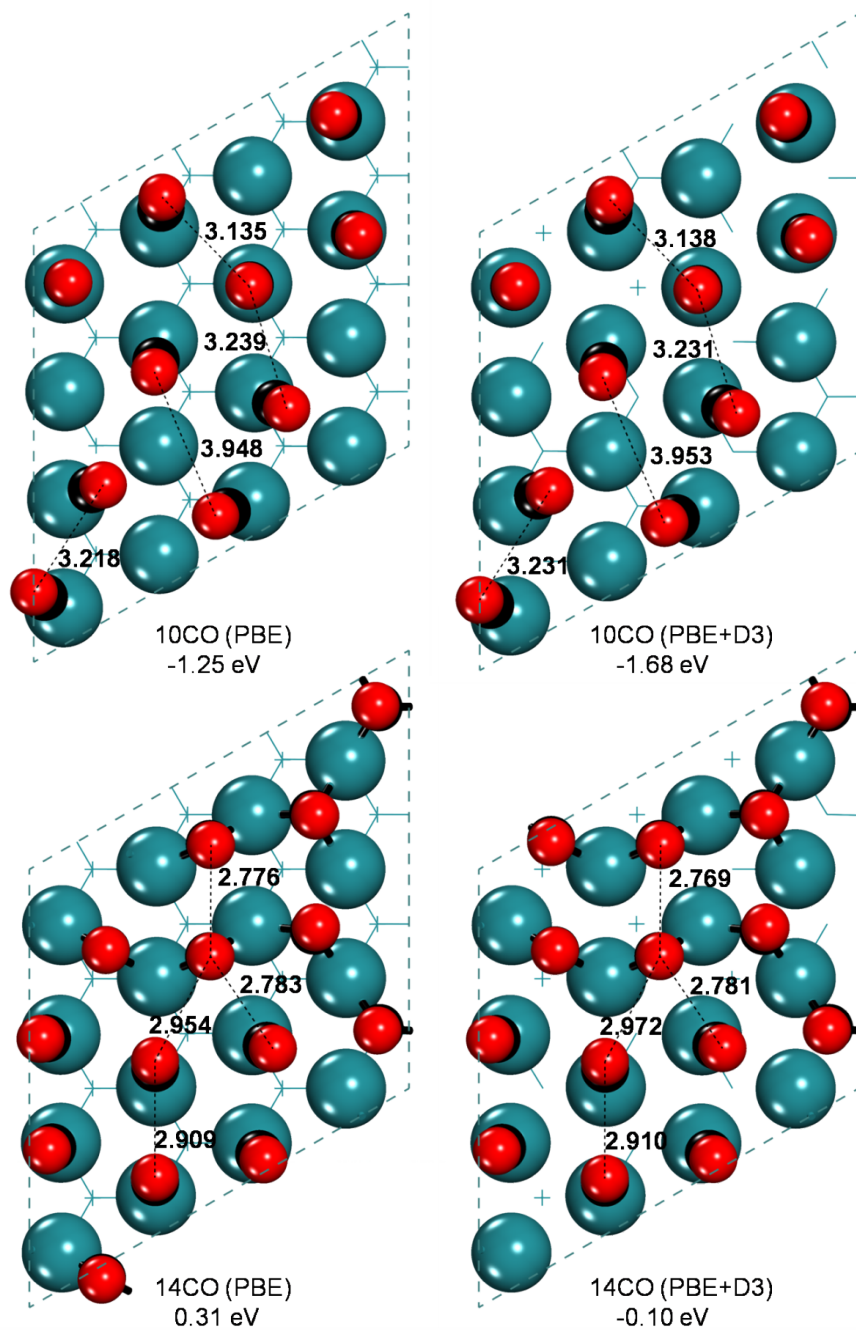

**Figure S3.** Stepwise H<sub>2</sub> adsorption structures and energies ( $\Delta E_{\text{ads}}$ ) on nCO pre-covered Ru(0001) (n =1-8, surface Ru/blue; C/black; O/red; H/yellow).

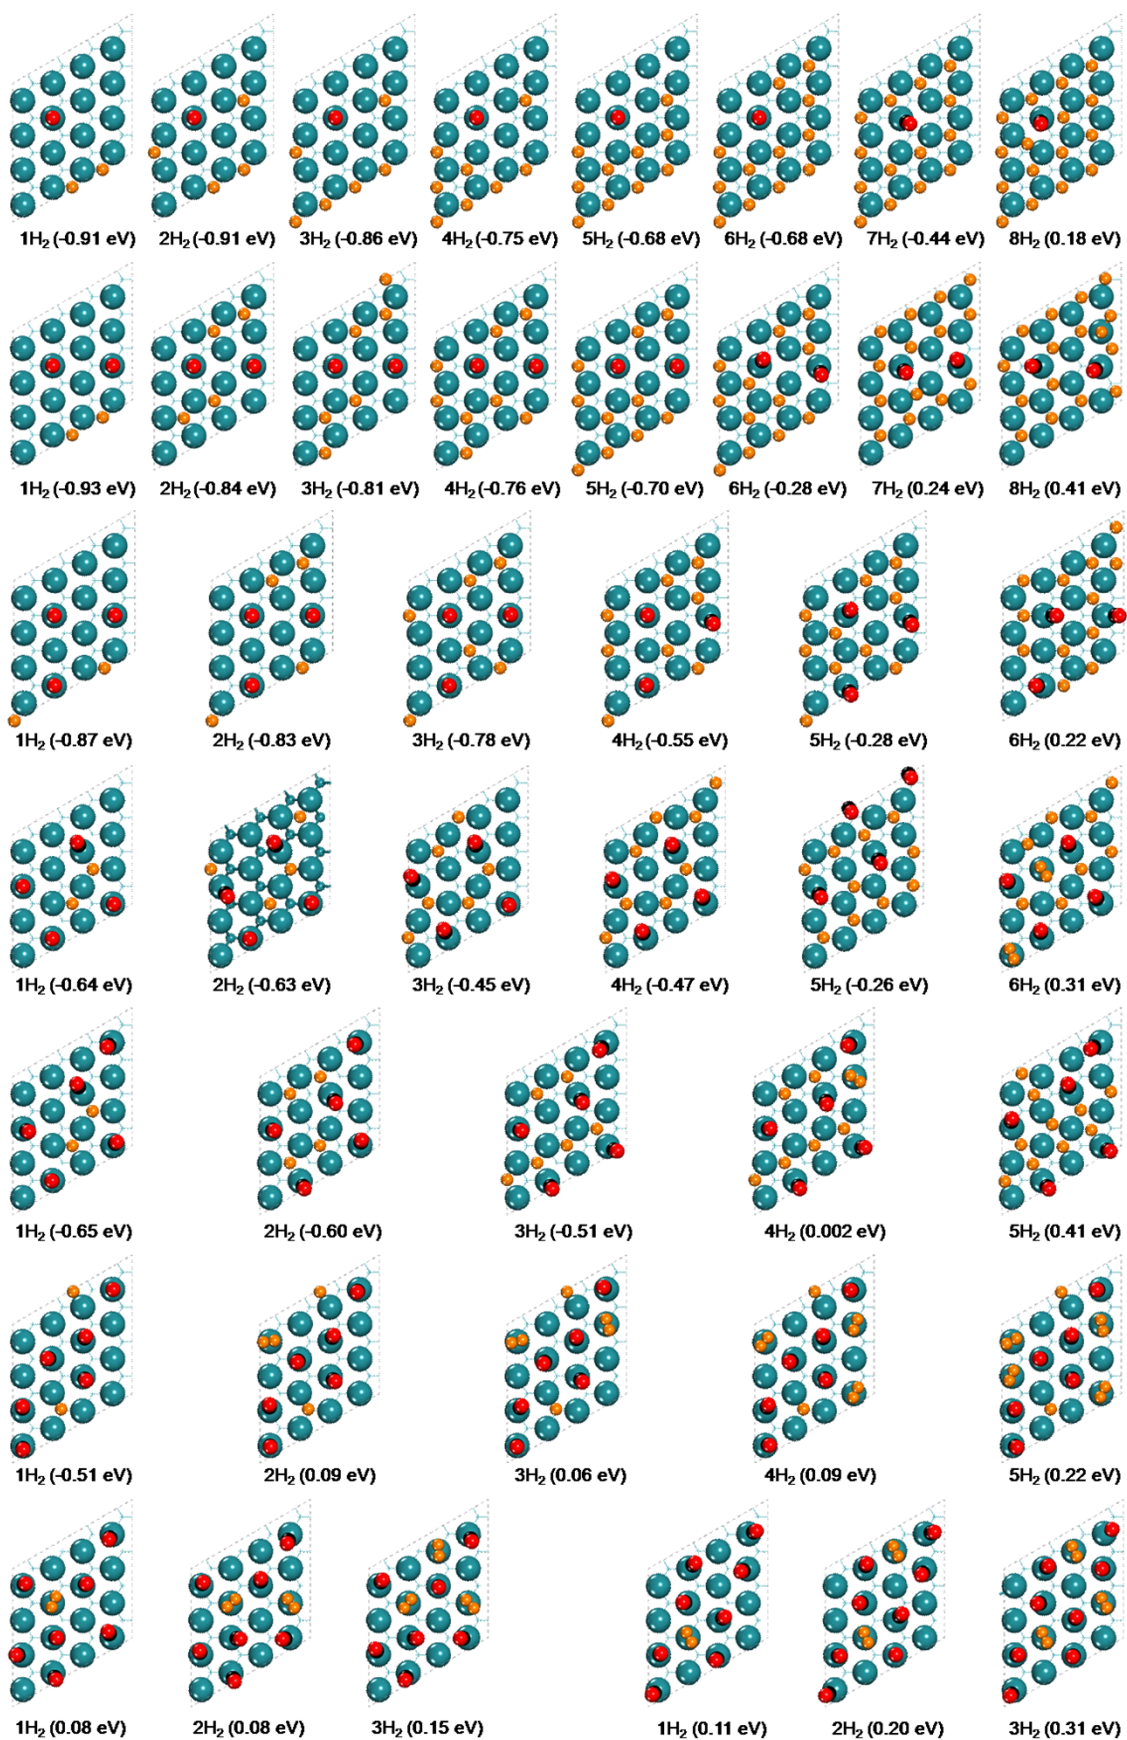

**Figure S4:** Dependence of surface Gibbs free energy ( $\Delta G$ ) and  $H_2$  on temperature at  $p_{H_2}/p^0 = 1 \times 10^{-13}$

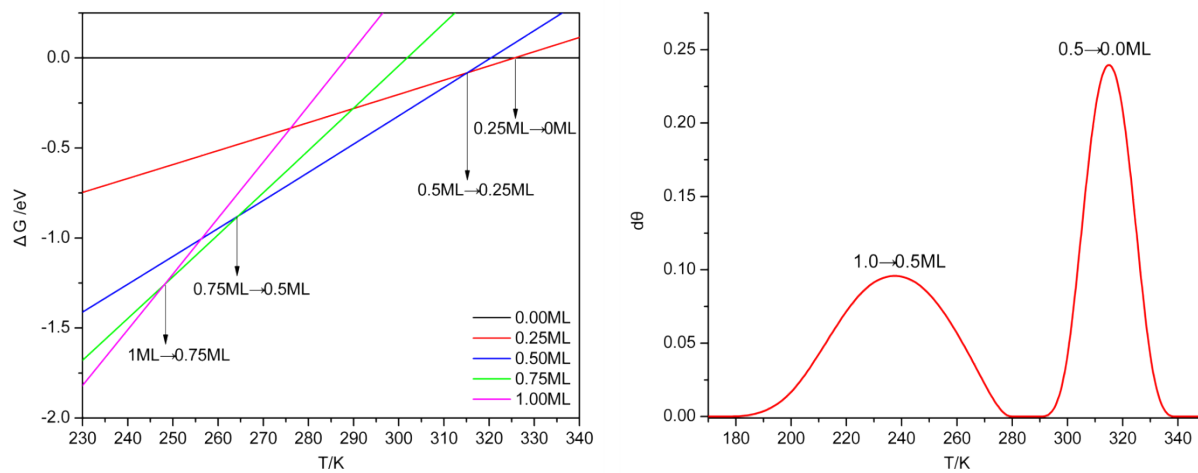

Table S1. Stepwise CO adsorption energies ( $E_{\text{ads}}$ , eV) including D3 corrections at different coverage

| ML   | $E_{\text{ads}}^{\text{a}}$ | $E_{\text{ads}}^{\text{b}}$ |
|------|-----------------------------|-----------------------------|
| 0.06 | -2.20                       | -2.38                       |
| 0.13 | -2.20                       | -2.37                       |
| 0.19 | -2.18                       | -2.25                       |
| 0.25 | -2.22                       | -2.14                       |
| 0.31 | -2.04                       | -2.40                       |
| 0.38 | -2.13                       | -2.01                       |
| 0.44 | -2.11                       | -2.46                       |
| 0.5  | -1.84                       | -2.21                       |
| 0.56 | -1.86                       | -2.40                       |
| 0.63 | -1.70                       | -2.06                       |
| 0.69 | -2.03                       | -2.43                       |
| 0.75 | -1.82                       | -2.05                       |
| 0.81 | -0.96                       | -1.58                       |
| 0.88 | -0.11                       | -0.52                       |

(a) Derived from D3 single-point energy calculations on the PBE optimized structures in parenthesis.

(b) Derived from D3 single-point energy calculations on the RPBE optimized structures in parenthesis.
